# Supplementary material
Source: Springer Nature journal article supplement (https://www.springermedizin.de/resource/supplementary/12883_2013_1010_MOESM3_ESM.pdf/9456650)

1. Information about help available from the community services
2. Confident where to get information about any matter related to stroke
3. Information about financial help
4. Confident you would know whom to contact if you had a problem
5. Information has generally been accurate
6. Information about stroke
7. Information about what to expect of someone who has had a stroke
8. Help provided to you
9. Services involved with your care lack co-ordination
10. Help from the community services when you've had a problem

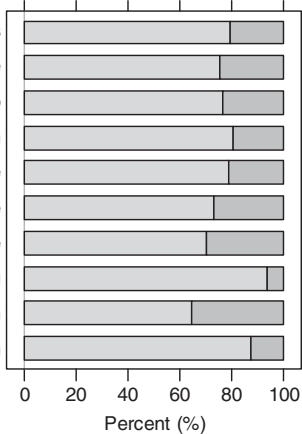

Satisfied

Not satisfied

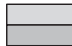

Supplement: MOESM3 [file 9456650]
